# Supplementary material
Source: PubMed Central journal article supplement (PMC6645975)
Supplement: ao7b01727_si_001.pdf [file ao7b01727_si_001.pdf]

## **Modulation of Cellular Response to Arsenic Trioxide Toxicity by Resveratrol**

Bodhisattwa Mondal<sup>1</sup>, Hongxia Chen<sup>1</sup>, Weihua Wen<sup>1</sup>, Ercole L. Cavalieri<sup>2</sup>, Eleanor G. Rogan<sup>1,2</sup>, and Muhammad Zahid<sup>1\*</sup>

Department of Environmental, Agricultural, and Occupational Health, College of Public Health<sup>1</sup>, and the Eppley Institute for Research in Cancer and Allied Diseases<sup>2</sup>, University of Nebraska Medical Center, Omaha, Nebraska.

### **Supporting Information File**

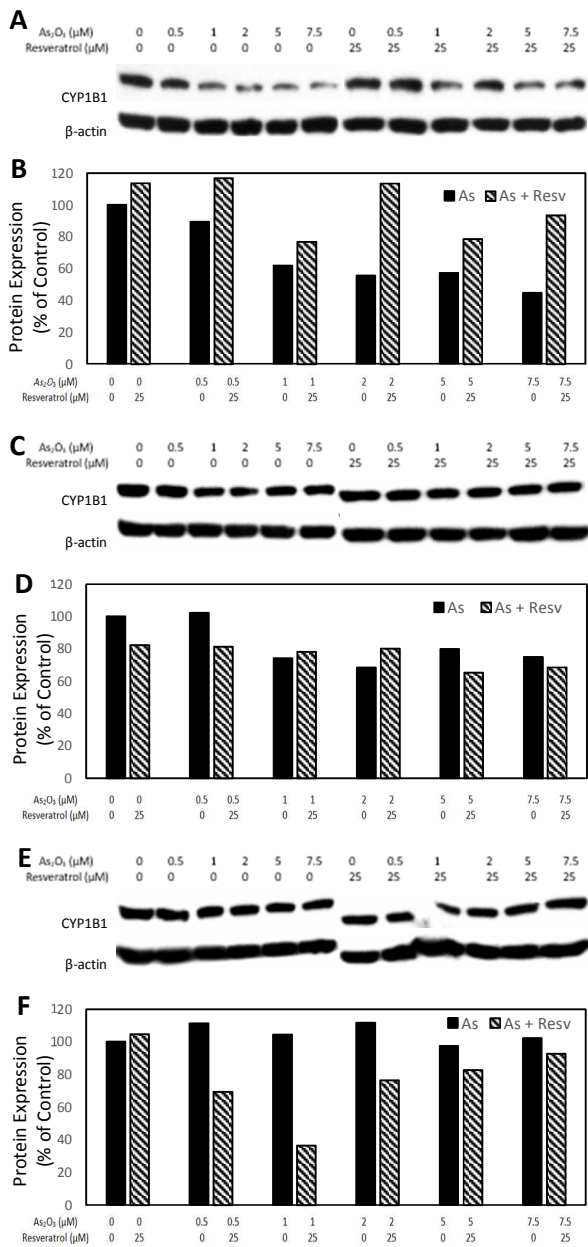

Figure S1. Expression of CYP1B1 by As<sub>2</sub>O<sub>3</sub> with and without resveratrol. (A), (C) and (E): qualitative images. (B), (D) and (F): quantitative data. (A & B) MCF10A cells. (C & D) MCF10F cells. (E & F) MCF12F cells.

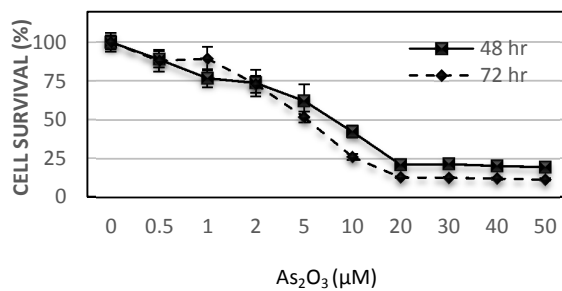

Figure S2. Viability of MCF12F cells treated with As<sub>2</sub>O<sub>3</sub>. Data are presented as mean ± standard error of the mean cell survival (%) from six independent experiments (n=6).
